# Supplementary material for: A series of robust metal–porphyrinic frameworks based on rare earth clusters and their application in N–H carbene insertion
Source: Royal Society of Chemistry journal article supplement (doi:10.1039/c6dt03678c), 2016-01-01
Supplement: c6dt03678c1.pdf [file c6dt03678c1.pdf]

Supporting Information for

## **A Series of Robust Metal-Porphyrinic Frameworks Based on Rare Earth Clusters and Their Application in N-H Carbene Insertion**

Lei Xu,<sup>a</sup> Meng-Ke Zhai,<sup>a</sup> Fei Wang,<sup>a</sup> Lin Sun,<sup>a</sup> Hong-Bin Du<sup>a\*</sup>

<sup>a</sup> State Key Laboratory of Coordination Chemistry, Collaborative Innovation Center of Chemistry for Life Sciences, School of Chemistry and Chemical Engineering, Nanjing University, Nanjing, 210023, China. E-mail: hbdu@nju.edu.cn

### **Table of Contents**

- S1. Chemicals and instrumentation.
- S2. Synthesis of NUPF-2M (M = Y, Gd, Tb, Dy, Er, Yb) crystals.
- S3. Scale-up synthesis of NUPF-2M assisted by microwave reaction.
- S4. Crystallography and general comment on the CHECKCIF report.
- S5. Simulated and as-synthesized PXRD patterns of NUPF-2M.
- S6. Comparison of the M<sub>9</sub> cluster found in NUPF-2M and Zr<sub>6</sub> cluster in PCN-223.
- S7. FT-IR spectroscopy of NUPF-2M.
- S8. TGA profile of NUPF-2M.
- S9. Solid-state UV-Vis spectra of NUPF-2M.
- S10. Gas adsorption analysis.
- S11. PXRD patterns of NUPF-2M at different conditions.
- S12. Metallization of NUPF-2Y with FeCl<sub>3</sub> and characterization of NUPF-2Y-FeCl.
- S13. Catalytic reactions
- S14. <sup>1</sup>H NMR spectra.
- S15. GC-MS profiles of the reaction of aniline in 10 mmol scale
- S16. Crystal data for NUPF-2M.
- S17. References.

## S1. Chemicals and instrumentation.

Commercially available reagents were purchased as analytical grade and used without further purification unless otherwise stated. Porphyrinic ligands tetrakis(4-carboxyphenyl)porphyrin (TCPP) and tetra-phenylporphyrin (TPP) were prepared according to the reported procedures.<sup>1</sup> Fe(TPP)Cl was synthesized via the method reported in literatures.<sup>2</sup> Pyrrole was purchased from Aladdin Inc., Yttrium nitrate hexahydrate ( $\text{Y}(\text{NO}_3)_3 \cdot 6\text{H}_2\text{O}$ , 99.95% REO), Gadolinium nitrate hexahydrate ( $\text{Gd}(\text{NO}_3)_3 \cdot 6\text{H}_2\text{O}$ , 99.95% REO), Terbium nitrate hexahydrate ( $\text{Tb}(\text{NO}_3)_3 \cdot 6\text{H}_2\text{O}$ , 99.99% REO), Dysprosium nitrate hexahydrate ( $\text{Dy}(\text{NO}_3)_3 \cdot 6\text{H}_2\text{O}$ , 99.99% REO), Erbium nitrate pentahydrate ( $\text{Er}(\text{NO}_3)_3 \cdot 5\text{H}_2\text{O}$ , 99.99% REO), Ytterbium nitrate pentahydrate ( $\text{Yb}(\text{NO}_3)_3 \cdot 5\text{H}_2\text{O}$ , 99.99% REO) were obtained from Energy Chemical; 2-fluorobenzoic acid was obtained from J&K Scientific; 4-fluoroaniline, 4-chloroaniline, 4-bromoaniline, 4-nitroaniline, *p*-toluidine, 4-aminobenzonitrile, 4-(trifluoromethyl)aniline were purchased from Heowns Biochemical Technology Co., Ltd. Other reagents were purchased from Sinopharm Chemical Reagent Co., Ltd.

Powder X-ray diffraction (PXRD) measurements were performed on a Bruker D8-Advance diffractometer with a Cu sealed tube ( $\lambda = 1.54178 \text{ \AA}$ ) at 40 kV and 40 mA. Elemental analysis (C, H and N) was performed by an Elementar Vario EL III element analyzer. Thermogravimetry analysis (TGA) was conducted on a Mettler-Toledo (TGA/DSC1) thermal analyzer under  $\text{N}_2$  atmosphere with a heating rate of  $10 \text{ }^\circ\text{C} / \text{min}$ . Fourier transform infrared spectra (FT-IR) were recorded as KBr pellets on a Bruker Tensor 27 FT-IR spectrometer. Proton nuclear magnetic resonance ( $^1\text{H}$  NMR) data were collected on Bruker Avance 300MHz spectrometer. The UV-Vis spectra were recorded on Varian Cary 5000 UV-Vis-NIR spectrophotometer using  $\text{BaSO}_4$  as reference. Inductively Coupled Plasma Optical Emission Spectrometry (ICP-OES) was obtained on Perkin Elmer Optima 5300DV. Supercritical Fluid Technologies (SFT) HPR-100 reactor was used to perform supercritical  $\text{CO}_2$  activation of the sample. Gas adsorption isotherms were collected by a volumetric method on a Micromeritics ASAP 2020 sorption analyzer,  $\text{N}_2$  adsorption isotherms were measured at 77 K.

## S2. Synthesis of NUPF-2M (M = Y, Gd, Tb, Dy, Er, Yb) crystals

All the target single crystals of NUPF-2M were obtained by using similar solvothermal method, therefore only the preparation of NUPF-2Y as a representative is described in detail.

**NUPF-2Y:** TCPP (10 mg, 0.012 mmol) and 2-fluorobenzoic acid (1 g, 7.14 mmol) were added into *N,N*-dimethylformamide (DMF, 2 mL) in a small capped vial and sonicated for ten minutes for dissolution. 0.5 mL deionized water and 38 mg of  $Y(NO_3)_3 \cdot 6H_2O$  (0.1 mmol, 45 mg for  $Gd(NO_3)_3 \cdot 6H_2O$ ,  $Tb(NO_3)_3 \cdot 6H_2O$ ,  $Dy(NO_3)_3 \cdot 6H_2O$ ,  $Er(NO_3)_3 \cdot 5H_2O$  and  $Yb(NO_3)_3 \cdot 5H_2O$ , respectively) were added into the above solution and further sonicated for ten minutes. The vial was placed into a Teflon lined acid-digestion bomb and heated at 120°C for 3 days, then it was allowed to cool to room temperature naturally. Small hexagonal-prism shaped crystals of NUPF-2Y were obtained followed by washing several times with DMF, ethanol and anhydrous ether, respectively. Yield: ~15.5 mg (78 %, based on porphyrin). Anal. Calcd for  $C_{144}H_{97}N_{12}O_{41}Y_9 \cdot 5H_2O \cdot 12DMF$ : C, 48.93; H, 4.36; N, 7.61 %, Found: C, 48.87; H, 4.62; N, 8.04 %. The overall formula of NUPF-2Y was determined by X-ray crystallography, elemental analysis, and thermogravimetric analysis. FT-IR (KBr pellet,  $cm^{-1}$ ):  $\nu = 3419(s), 1661(m), 1601(s), 1534(m), 1412(s), 1180(w), 1147(w), 1102(m), 1019(w), 963(m), 851(w), 797(w), 776(w), 723(m), 483(m)$ .

**NUPF-2Gd:** Yield: ~16 mg (81 %, based on porphyrin). Anal. Calcd for  $C_{144}H_{97}N_{12}O_{41}Gd_9 \cdot 9H_2O \cdot 15DMF$ : C, 42.63; H, 4.16; N, 7.10 %, Found: C, 42.87; H, 4.57; N, 7.84 %. The overall formula of NUPF-2Gd was determined by X-ray crystallography, elemental analysis, and thermogravimetric analysis. FT-IR (KBr pellet,  $cm^{-1}$ ):  $\nu = 3416(s), 3131(m), 1607(m), 1540(s), 1415(s), 1186(w), 1153(w), 1107(w), 1022(w), 963(s), 865(w), 806(m), 770(m), 728(m), 482(m)$ .

**NUPF-2Tb:** Yield: ~16 mg (81 %, based on porphyrin). Anal. Calcd for  $C_{144}H_{97}N_{12}O_{41}Tb_9 \cdot 9H_2O \cdot 10DMF$ : C, 43.26; H, 3.86; N, 6.38 %, Found: C, 43.67; H, 4.23; N, 6.74 %. The overall formula of NUPF-2Tb was determined by X-ray crystallography, elemental analysis, and thermogravimetric analysis. FT-IR (KBr pellet,  $cm^{-1}$ ):  $\nu = 3392(s), 1612(m), 1536(m), 1408(s), 1183(w), 1107(w), 1022(w), 963(m), 852(w), 806(w), 773(w), 721(m), 485(m)$ .

**NUPF-2Dy:** Yield: ~14 mg (71 %, based on porphyrin). Anal. Calcd for

$C_{144}H_{97}N_{12}O_{41}Dy_9 \cdot 6H_2O \cdot 7DMF$ : C, 41.87; H, 3.36; N, 5.62 %, Found: C, 42.27; H, 3.73; N, 6.04 %. The overall formula of NUPF-2Dy was determined by X-ray crystallography, elemental analysis, and thermogravimetric analysis. FT-IR (KBr pellet,  $cm^{-1}$ ):  $\nu = 3419(s), 3131(m), 1609(m), 1539(m), 1402(s), 1173(w), 1022(w), 968(m), 858(w), 796(w), 773(w), 725(w), 485(m)$ .

**NUPF-2Er**: Yield: ~17 mg (85 %, based on porphyrin). Anal. Calcd for  $C_{144}H_{97}N_{12}O_{41}Er_9 \cdot 6H_2O \cdot 9DMF$ : C, 41.72; H, 3.52; N, 5.98 %, Found: C, 41.53; H, 3.68; N, 6.35 %. The overall formula of NUPF-2Er was determined by X-ray crystallography, elemental analysis, and thermogravimetric analysis. FT-IR (KBr pellet,  $cm^{-1}$ ):  $\nu = 3419(s), 1658(m), 1602(s), 1540(m), 1417(s), 1098(w), 1018(w), 963(m), 857(w), 795(w), 711(w), 774(w), 723(m), 481(m)$ .

**NUPF-2Yb**: Yield: ~16 mg (81 %, based on porphyrin). Anal. Calcd for  $C_{144}H_{97}N_{12}O_{41}Yb_9 \cdot 8H_2O \cdot 10DMF$ : C, 41.11; H, 3.63; N, 6.06 %, Found: C, 41.48; H, 3.82; N, 6.15 %. The overall formula of NUPF-2Yb was determined by X-ray crystallography, elemental analysis, and thermogravimetric analysis. FT-IR (KBr pellet,  $cm^{-1}$ ):  $\nu = 3399(s), 1605(m), 1541(m), 1419(s), 1176(w), 1105(w), 1020(w), 966(m), 854(w), 796(w), 771(w), 723(w), 480(m)$ .

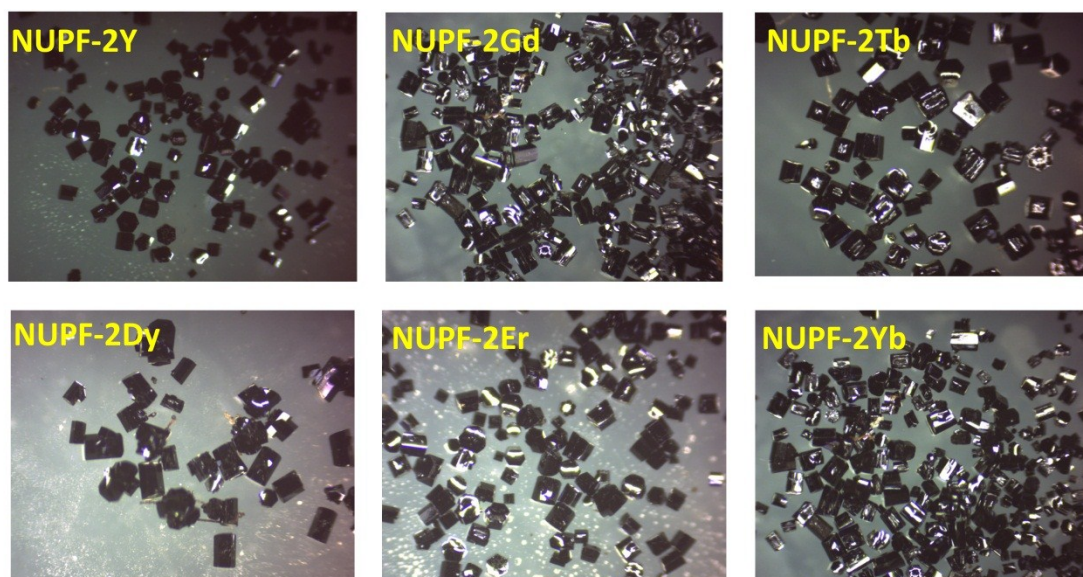

Fig. S1 Optical microscopy images of the obtained NUPF-2M crystals.

### S3. Scale-up synthesis of NUPF-2M assisted by microwave reaction

All target NUPF-2M powders could be obtained by using similar protocol, therefore only the preparation of NUPF-2Y as a representative is described in detail.

Typically, 150 mg of TCPP and 12 g of 2-fluorobenzoic acid were added into 30 mL DMF in a round-bottom flask and sonicated for ten minutes for dissolution. Subsequently, 570 mg of  $Y(NO_3)_3 \cdot 6H_2O$  and 7.5 mL deionized water were added to the solution and further sonicated for ten minutes. The mixture was heated by a microwave synthesizer (LWMC-201 from Nanjing Robiot Co., Ltd) at 130 Watt for 6 hours. The product was obtained by centrifugation and washed with DMF and EtOH several times. Yield: 260 mg, 85% based on porphyrin ligand.

#### **S4. Crystallography and general comments on the CHECKCIF report.**

A single crystal of NUPF-2M was isolated from the mother liquor and mounted on the sample holder via a nylon loop imbed in Paratone-N. All the X-ray diffraction data of NUPF-2M were collected on a Bruker D8 Venture diffractometer outfitted with a PHOTON-100 CMOS detector using monochromatic microfocus MoK $\alpha$  radiation ( $\lambda = 0.71073 \text{ \AA}$ ) that was operated at 50 kV and 40 mA at 123 K by chilled nitrogen flow controlled by a KRYOFLEX II low temperature attachment. Unit cell determination was performed in the Bruker SMART APEX III software suite. The data sets were reduced and a multi-scan spherical absorption correction was implemented in the SCALE interface.<sup>3</sup> The structures were solved with direct methods and refined by the full-matrix least-squares method in the SHELXL-97 program package.<sup>4</sup> The contribution of disordered solvent molecules was treated as diffuse using SQUEEZE procedure implemented in PLATON.<sup>5</sup> Crystallographic data for NUPF-2M described in this paper have been deposited with the Cambridge Crystallographic Data Center (CCDC) as supplementary publication (CCDC-1490360 for NUPF-2Y, CCDC-1490362 for NUPF-2Yb, CCDC-1490366 for NUPF-2Dy, CCDC-1490367 for NUPF-2Er, CCDC-1490368 for NUPF-2Gd, CCDC-1490369 for NUPF-2Tb). Copy of the data can be obtained free of charge on application to CCDC.

#### **General comments on the CHECKCIF reports.**

It is a unique and frequently-encountered phenomenon in MPFs that when performing the X-ray diffraction analysis, the diffraction (especially in high angles) was weak. In some cases, such limited diffraction even could not be improved by using synchrotron radiation.<sup>6</sup> Besides the weak X-ray diffraction at high angles, there exists many disordered parts (phenyl ring, metal cluster, coordination water, *etc.*) and

large structural voids containing disordered solvents in the structures of NUPF-2M. Thus, some alerts are present in the CHECKCIF report and the corresponding responses are imbedded in the CIF file. We are confident the structural characterization is valid. Some common alerts and response are present as follows:

RFACR01\_ALERT\_3\_B The value of the weighted R factor is > 0.35

Weighted R factor given 0.430

Response: We made several attempts to obtain better quality data for this structure. However, due to the existence of many disordered parts (phenyl ring, metal cluster, coordination water, etc.) and the weak X-ray diffraction *etc.* the R2 value is high. This structure is similar with other 5 structures of NUPF-2 series. We are confident the structural characterization is valid.

PLAT342\_ALERT\_3\_B Low Bond Precision on C-C Bonds..... 0.02125 Ang.

Response: This problem arises from the weak X-ray diffraction of the crystal at high angles.

PLAT420\_ALERT\_2\_B D-H Without Acceptor \*O5 -- \*H5 ... Please Check

Response: This problem may arise from the disordered nature of O5 and H5 atoms.

### S5. Simulated and as-synthesized PXRD patterns of NUPF-2M.

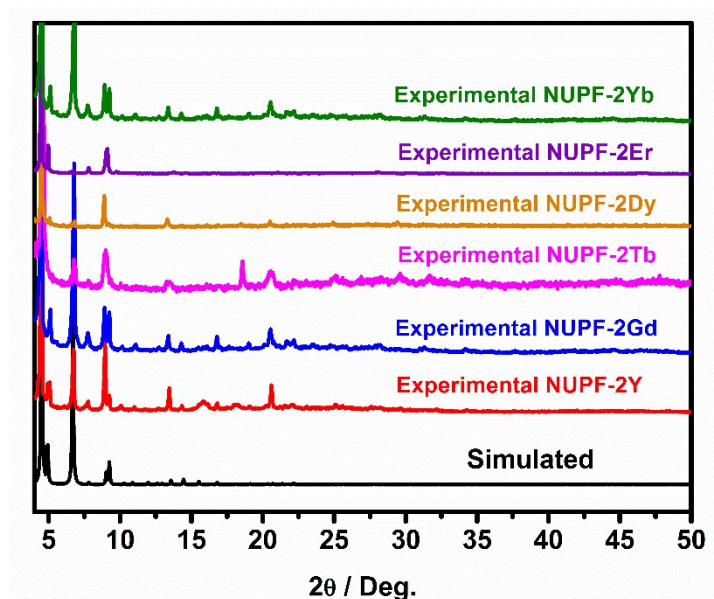

Fig. S2 PXRD patterns of NUPF-2M simulated and as-synthesized.

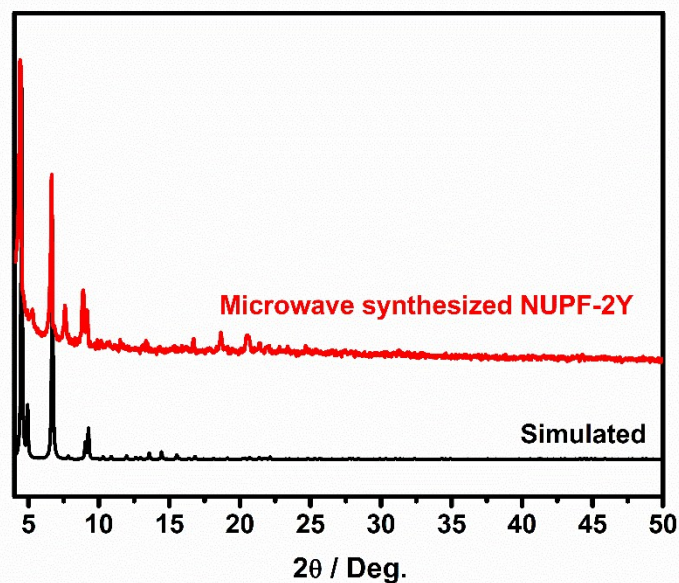

Fig. S3 Representative PXRD patterns of NUPF-2Y synthesized by microwave reaction.

#### S6. Comparison of the RE<sub>9</sub> cluster found in NUPF-2M and Zr<sub>6</sub> cluster in PCN-223.

The overall structure of NUPF-2M was similar to the recently reported Zr-MPF PCN-223,<sup>7</sup> for example, all porphyrin ligands in both structures are 4-connected and the metal clusters served as 12-connected structural nodes; both structures have similar channels. Though the two types of clusters seemly constitute 18 atoms, the Zr atoms in PCN-223 are 3-fold disordered and the overall formula was determined to be Zr<sub>6</sub>. While in the nonanuclear RE cluster in NUPF-2M, the RE atoms were disordered over two positions with 1:1 occupancy ratio, giving the overall RE<sub>9</sub> cluster that make it possess truncated dodeca-pyramid geometry (Fig. S4).

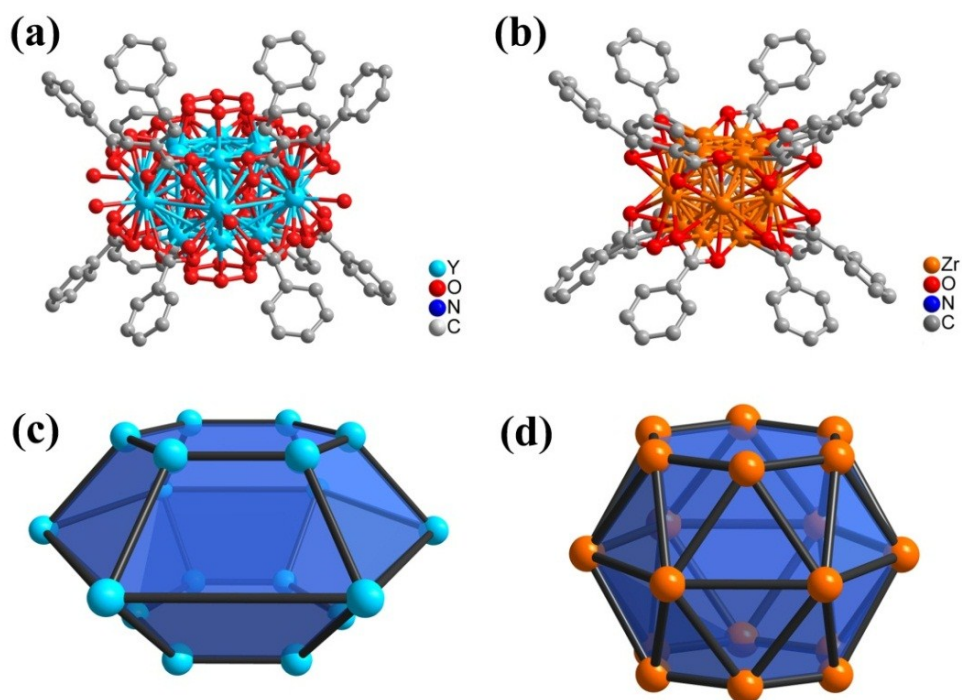

Fig. S4 (a) 2-fold disordered RE<sub>9</sub> clusters found in NUPF-2M (RE = Y, Yb, Tb, Gd, Er, Dy). (b) 3-fold disordered Zr<sub>6</sub> cluster found in PCN-223. (c) and (d) Simplified Y<sub>9</sub> and Zr<sub>6</sub> cluster.

### S7. FT-IR spectroscopy of NUPF-2M.

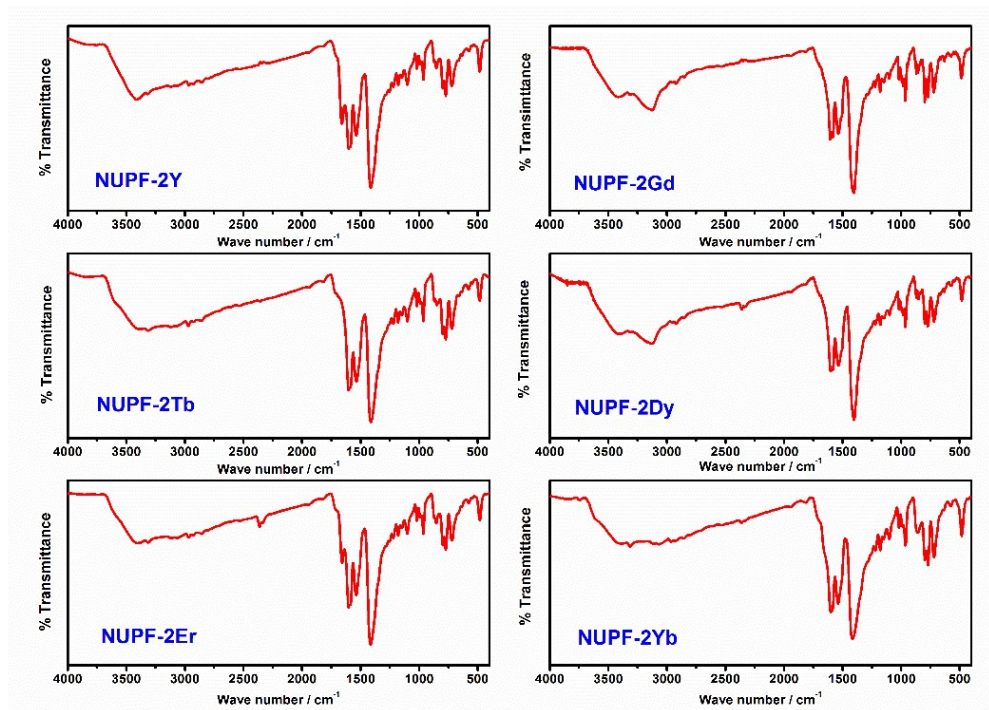

Fig. S5 FT-IR spectra of NUPF-2M.



### S8. TGA profile of NUPF-2M.

Thermogravimetric analyses of the NUPF-2M were conducted from room temperature to 800 °C under N<sub>2</sub> atmosphere. The six NUPF-2M exhibit similar thermal behaviors. The weight losses from room temperature to *ca.* 180 °C correspond to the release of solvent molecules that were trapped in the crystal pores and/or absorbed on the crystal surfaces (five H<sub>2</sub>O and twelve DMF for NUPF-2Y, ~21.87%, calcd 21.2%; nine H<sub>2</sub>O and fifteen DMF for NUPF-2Gd, ~23.61%, calcd 23.72%; nine H<sub>2</sub>O and teen DMF for NUPF-2Tb, ~17.87%, calcd 17.93%; six H<sub>2</sub>O and seven DMF for NUPF-2Dy, ~13.57%, calcd 13.07%; six H<sub>2</sub>O and nine DMF for NUPF-2Er, ~15.3%, calcd 15.5%; eight H<sub>2</sub>O and ten DMF for NUPF-2Yb, ~17.1%, calcd 17.2%). A plateau up to *ca.* 500 °C was followed, implying that NUPF-2M was stable up to 500 °C. After the plateau, NUPF-2M began to decompose. The high thermal stability of NUPF-2M was further verified by checking the PXRD patterns of the samples, which were heated at 400 °C under Ar for 30 min (see main text).

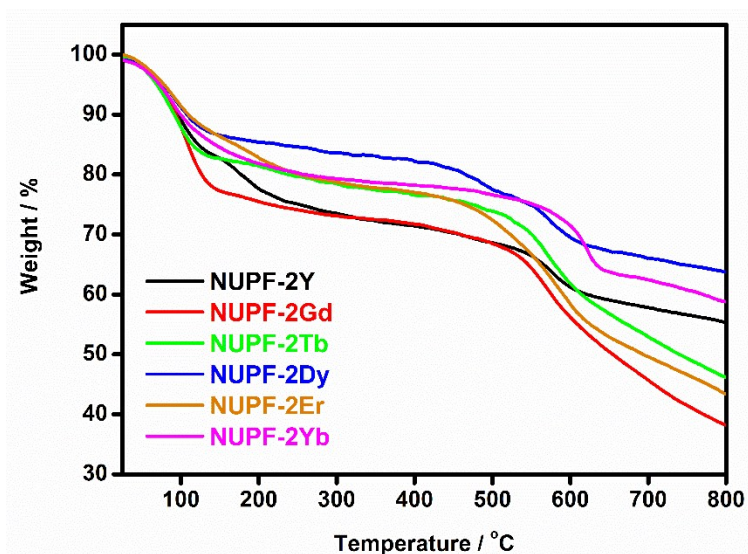

Fig. S6 TGA profiles of NUPF-2M measured from room temperature to 800 °C at a ramp rate of 10 °C / min under N<sub>2</sub> with a 100 mL / min flow speed.

### S9. Solid-state UV-Vis spectra of NUPF-2M.

All solid-state UV-Vis spectra of NUPF-2M were similar. An intense absorption band at 370 nm and four smaller bands at *ca.* 501, 538, 589, 649 nm were observed and these bands could be ascribed to the Soret band and Q bands of porphyrin, respectively.

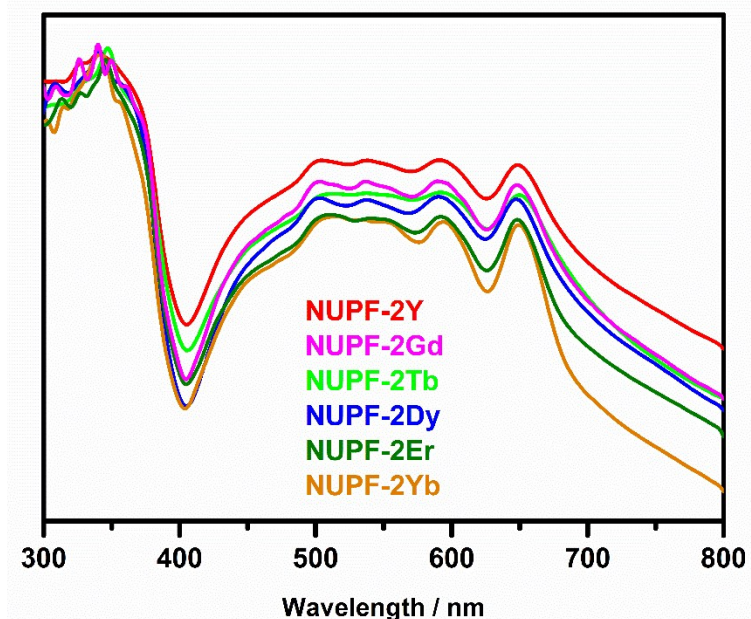

Fig. S7 Solid-state UV-Vis spectra of NUPF-2M.

#### S10. Gas adsorption analysis.

Sample activation: the freshly-prepared samples of NUPF-2M were soaked in MeOH for solvent exchanging, with MeOH refreshed every 12 hours. The procedure was repeated six times. Then the samples were soaked in  $\text{CH}_2\text{Cl}_2$  for further solvents exchanging, with  $\text{CH}_2\text{Cl}_2$  refreshed every 12 hours and repeated six times. Supercritical carbon dioxide (SCD) activation technique was then applied to activate NUPF-2M. The samples were transferred into an SFT HPR-100 reactor. The pressure and temperature gradually rose up to 1400 psi and 40 °C, respectively, and were maintained for 2 hours. The pressure was then released slowly during a period of 1 hour while temperature was still kept at 40 °C. This procedure was repeated three times. The activated samples were further activated in the analysis tube under vacuum using the “degas” function of the adsorption analyzer at 150 °C for 8 h.

**Table S1** BET and Langmuir surface areas of NUPF-2M derived from N<sub>2</sub> adsorptions.

| Sample   | BET surface area (m <sup>2</sup> /g) | Langmuir surface area (m <sup>2</sup> /g) |
|----------|--------------------------------------|-------------------------------------------|
| NUPF-2Y  | 1948                                 | 2607                                      |
| NUPF-2Gd | 1695                                 | 2239                                      |
| NUPF-2Tb | 1608                                 | 2120                                      |
| NUPF-2Dy | 1535                                 | 2040                                      |
| NUPF-2Er | 1394                                 | 1834                                      |
| NUPF-2Yb | 1219                                 | 1603                                      |

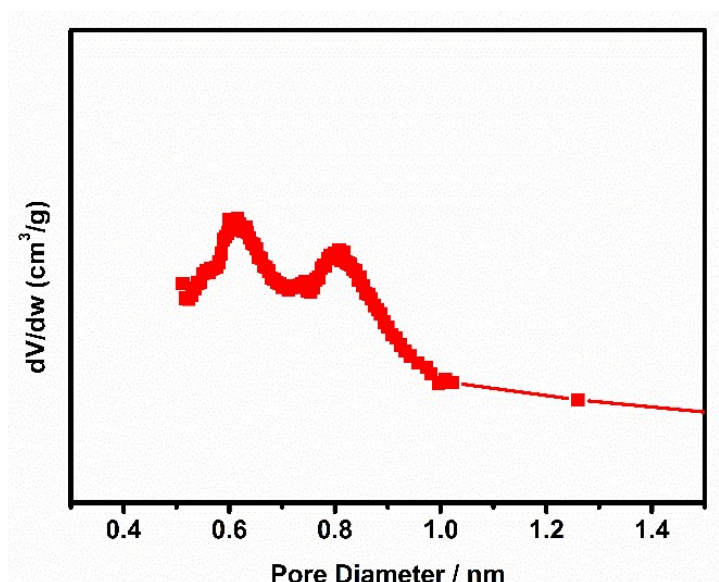

Fig. S8 Pore size distribution for NUPF-2Y using data measured with N<sub>2</sub> at 77K. Since the isostructural nature of NUPF-2M, only NUPF-2Y was present as a representative.

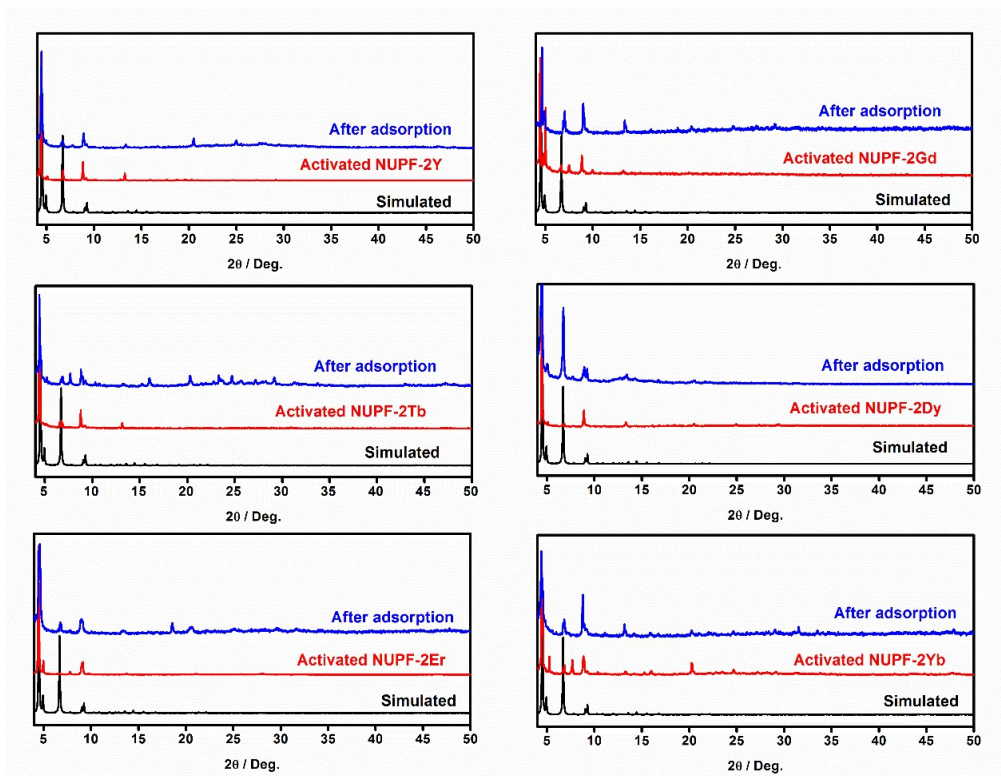

Fig. S9 PXR D patterns of NUPF-2M before and after  $N_2$  adsorption measurements.

### S11. PXR D patterns of NUPF-2M at different conditions.

About 15 mg of sample was soaked in different solutions for 3 days. After that, all the samples were filtered and washed with ethanol and anhydrous ether. For the sample in open air, about 20 mg of sample was put in a small beaker and put this beaker in ventilation place for 3 days. Then PXR D measurements were performed to check the structural stability of all samples. Since the stability of NUPF-2M is similar, only the PXR D patterns of NUPF-2Y were present as a representative.

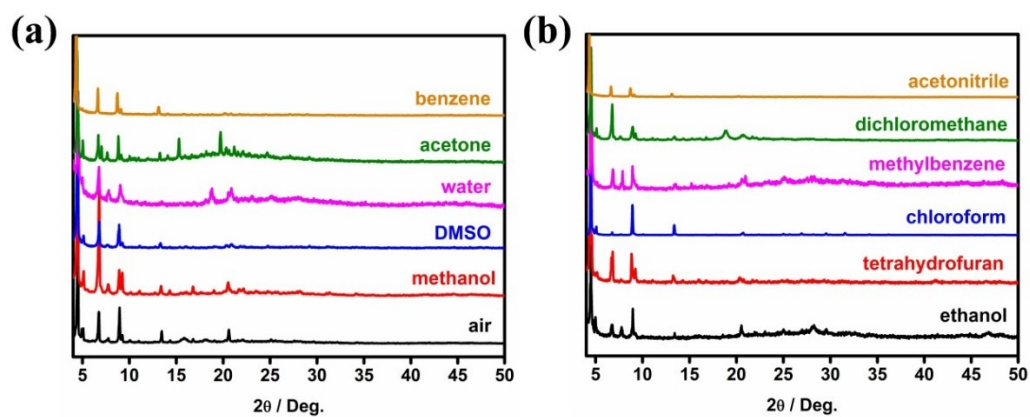

Fig. S10 PXR D patterns of NUPF-2Y under different conditions for 3 days.

## S12. Metallization of NUPF-2Y with FeCl<sub>3</sub> and characterization of NUPF-2Y-FeCl.

The metallization process of NUPF-2Y by FeCl<sub>3</sub> could be accomplished by heating NUPF-2Y and FeCl<sub>3</sub> in DMF for 12 hours. Typically, 175 mg of NUPF-2Y and 233 mg of FeCl<sub>3</sub> were dispersed in 10 mL DMF. The resulting mixture was stirred and heated at 120 °C for 12 hours. After the mixture cooled to room temperature, the product was isolated by centrifugation and washed thoroughly with DMF and EtOH. As shown in Fig. S11a, the crystallinity of NUPF-2Y was well reserved after the metallization process because of its high structural stability. In the FT-IR spectra shown in Fig. S11b, the weak N-H vibration of core-free porphyrin of NUPF-2Y was found at 963 cm<sup>-1</sup>. After metallation with FeCl<sub>3</sub>, this band was disappeared and a new strong absorption band at 999 cm<sup>-1</sup> was observed, which is the characteristic vibration of Fe-N in metalloporphyrins,<sup>8</sup> suggesting that Fe was successfully inserted into the porphyrin core. For ICP-OES measurement, 10 mg of NUPF-2Y-FeCl sample was dissolved in 10 mL concentrated HNO<sub>3</sub> (65%) and heating at 80 °C under stirring for 1 hour, then 5 mL H<sub>2</sub>O<sub>2</sub> (30%) was added dropwise and heated for other 2 hours. The resulting solution was diluted for 50 times for testing after cooled to room temperature. The results reveal NUPF-2Y-FeCl contains 14.8 mg/L Y ions and 3.11 mg/L Fe ions; the mol ratio of Y/Fe was 2.994:1, very close to the theoretical value of 3:1. Thus we believe almost all porphyrin centers of NUPF-2Y were metallized by FeCl unit.

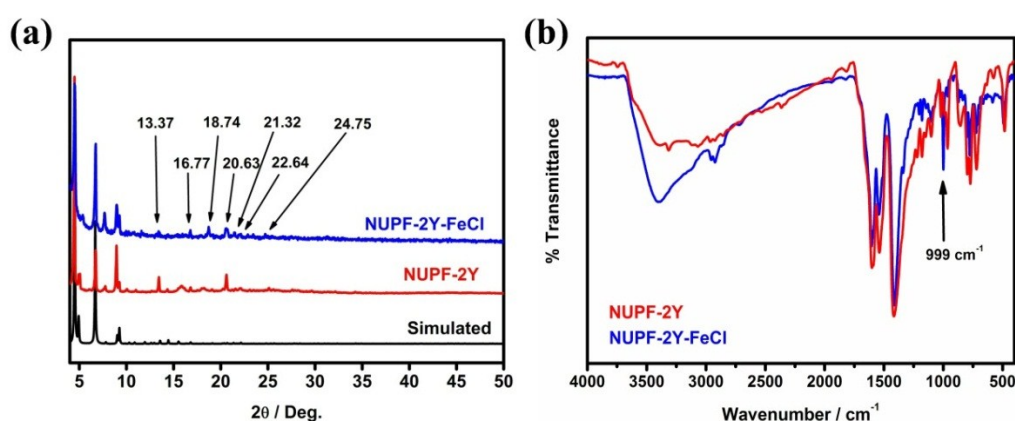

Fig. S11 (a) PXRD patterns of NUPF-2Y before and after metallization with FeCl<sub>3</sub>, small peaks at  $2\theta = 13.37, 16.77, 18.74, 20.63, 21.32, 22.64$  and  $24.75$  belong to (022), (032), (041), (042), (-151), (050), (043), (050) and (052) diffraction peaks of NUPF-2Y-FeCl, respectively. (b) FT-IR curves of NUPF-2Y and NUPF-2Y-FeCl.

In the UV-Vis spectra of NUPF-2Y-FeCl shown in Fig. S12, the Soret band of NUPF-2Y-FeCl was located at 373 nm, while 540 nm and 589 nm bands were ascribed to the Q bands of NUPF-2Y-FeCl. Compared with NUPF-2Y, the slight red shift of the Soret band and reduction of the Q band number from four to two were ascribed to the metallization of the porphyrin core.<sup>9</sup>

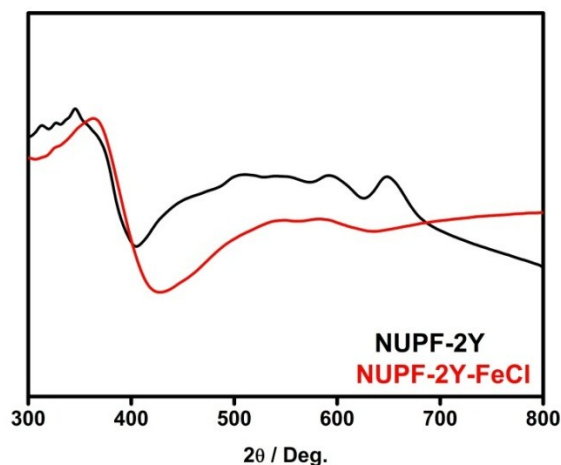

Fig S12 Solid-state UV-Vis spectra of NUPF-2Y and NUPF-2Y-FeCl.

### S13. Catalytic reactions

**General:** Round-bottom flasks used in the catalytic reaction were dried in an oven at 120 °C prior to use. Ethyl diazoacetate (EDA),<sup>10</sup> Fe(TPP)Cl<sup>2</sup> were prepared according to literature procedures. Aniline was distilled from CaH<sub>2</sub> under reduced pressure. Dichloromethane was distilled from CaH<sub>2</sub> and purged by argon before to use. Catalyst NUPF-2Y-FeCl was dried at 150 °C under vacuum for 12 hours before to use. Other reagents and solvents were used as received from commercial sources without any further purification.

**Catalytic test:** In a 25 mL round-bottom flask, an amine (0.3 mmol) was dissolved in 8 mL of dichloromethane which contains 1 % mmol catalyst (3.7 mg for NUPF-2Y-FeCl and 2.1 mg for Fe(TPP)Cl, based on Fe-porphyrin unit) and high purity Ar was bubbled through the solution for 10 min. Then EDA (1.20 equiv, 0.36 mmol) in 1 mL of dichloromethane was added under Ar stream, and the reaction mixture was stirred for a given time. Upon completion of the reaction, as checked by TLC (approximately 30 min for NUPF-2Y-FeCl), the solvent was removed and the products were purified by purified by flash chromatography. For catalyst recycling test, when

the reaction was complete, the catalyst was separated by centrifugation and directly used for another catalytic run.

*CAUTION: ethyl diazoacetate (EDA) used in the catalytic experiments is potentially explosive, the operations should be carried out in a well-ventilated hood with an adequate safety shield. Besides, rapid gas release was observed during the catalytic reaction, reaction vessels should be handled with care.*

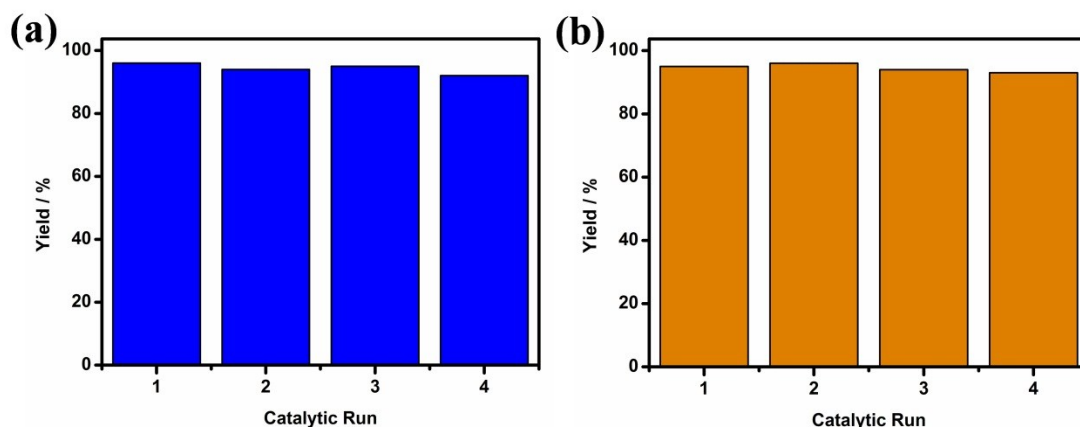

Fig. S13 The catalytic yield in the reaction of aniline as substrate (a) and 4-fluoroaniline as substrate (b), respectively.

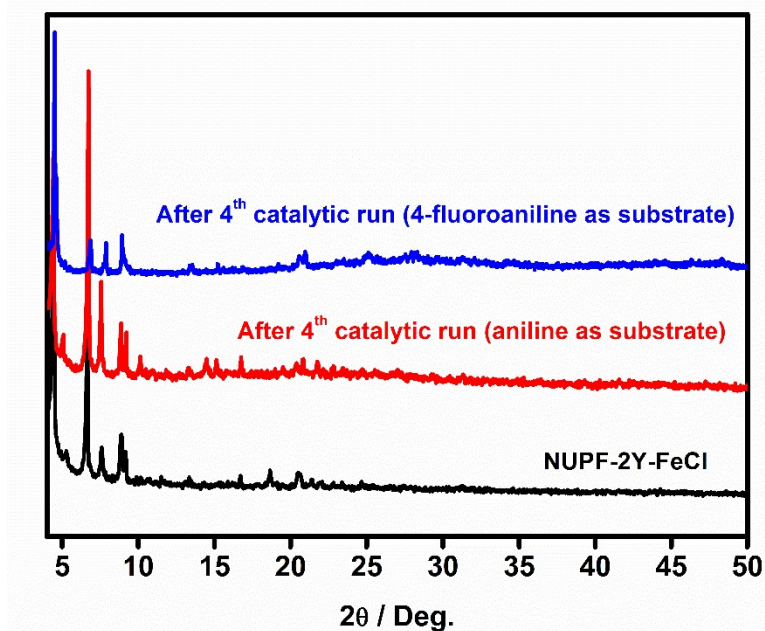

Fig. S14 PXRD patterns of NUPF-2Y-FeCl before and after 4<sup>th</sup> catalytic run (aniline and 4-fluoroaniline as substrates).

### S14. $^1\text{H}$ NMR spectra.

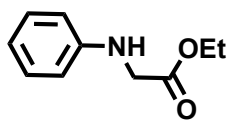

Ethyl phenylglycinate:<sup>11</sup> white solid, ethyl acetate/hexane = 1:10,  $R_f$  = 0.35.

$^1\text{H}$  NMR ( $\text{CDCl}_3$ , 300 MHz),  $\delta$  7.22 (q, 2H), 6.78 (t, 1H), 6.65 (d, 2H), 4.28 (q, 2H), 3.93 (s, 2H), 1.32 (t, 3H).

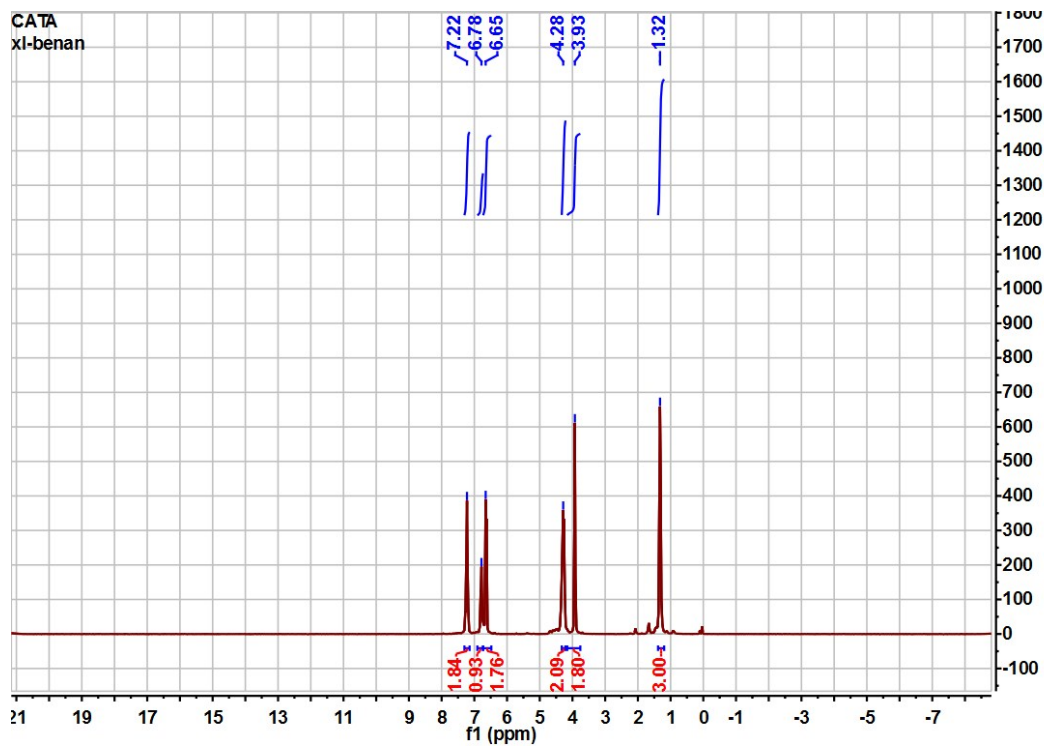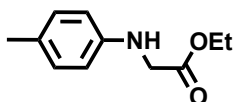

Ethyl *p*-tolylglycinate:<sup>12</sup> yellow solid, ethyl acetate/hexane = 1:10,  $R_f$  = 0.4.

$^1\text{H}$  NMR ( $\text{CDCl}_3$ , 300 MHz),  $\delta$  6.99 (d, 2H), 6.54 (d, 2H), 4.42 (q, 2H), 3.87 (s, 2H), 2.23 (s, 3H), 1.28 (t, 3H).

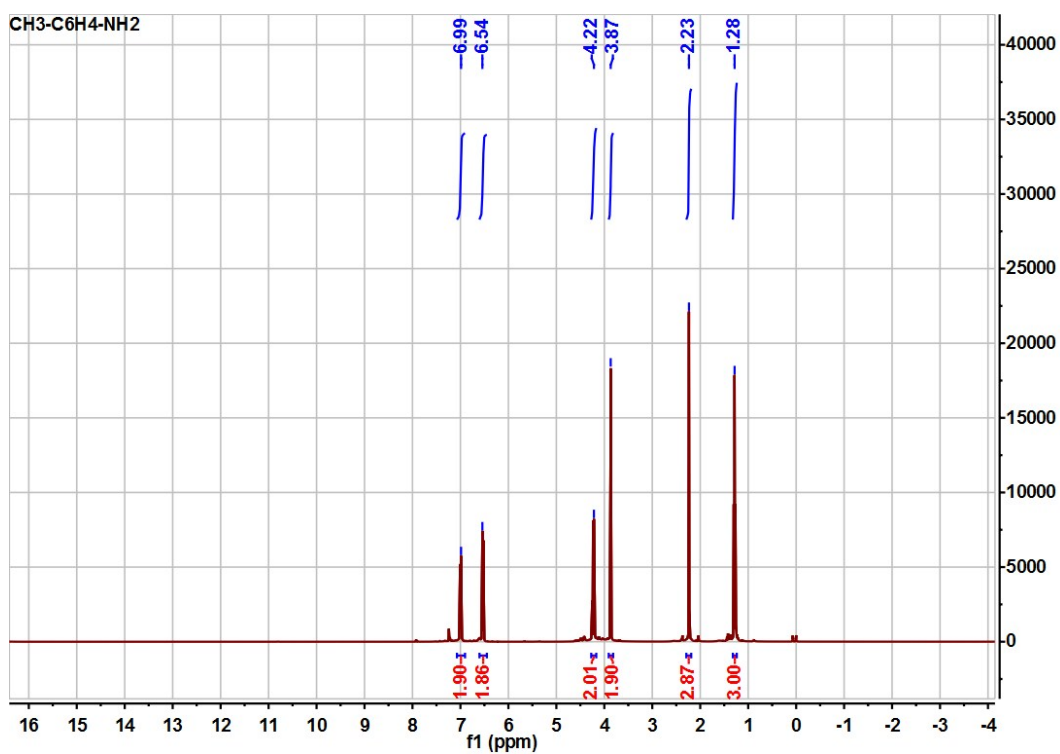



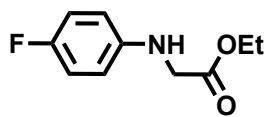

Ethyl (4-fluorophenyl)glycinate:<sup>12</sup> colorless crystals, ethyl acetate/hexane = 1:5,  $R_f = 0.5$ .  $^1\text{H NMR}$  ( $\text{CDCl}_3$ , 300 MHz),  $\delta$  6.90 (d, 2H), 6.55 (q, 2H), 4.23 (q, 3H), 3.86 (s, 2H), 1.29 (t, 3H).

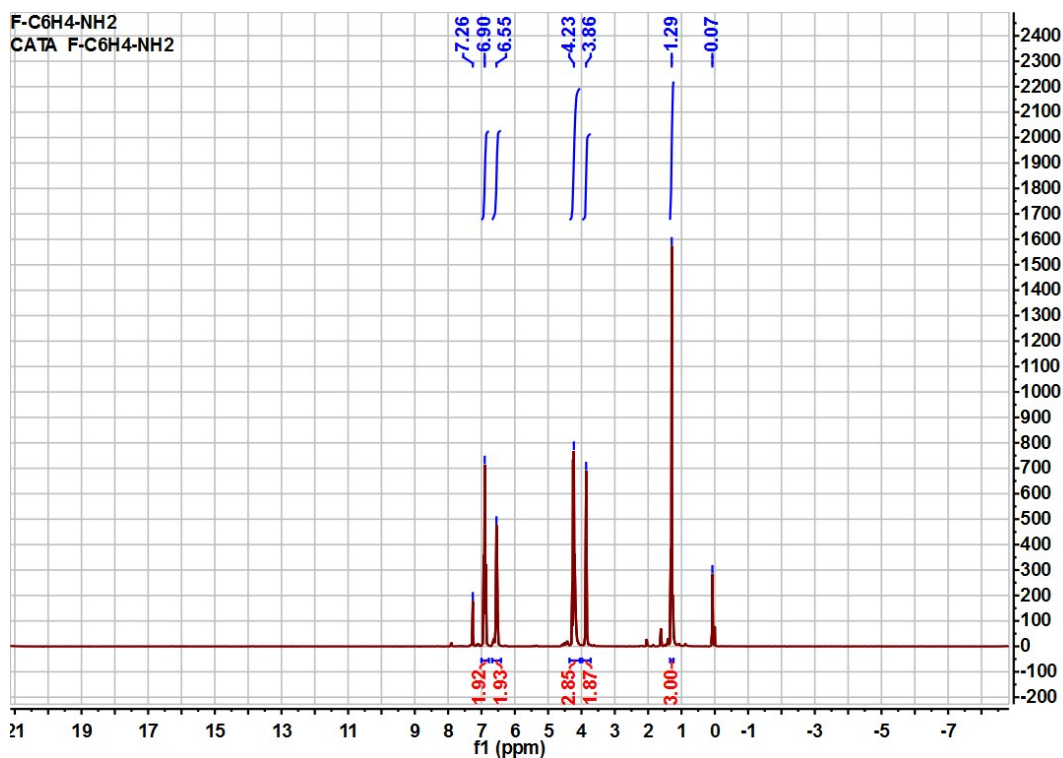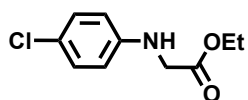

Ethyl (4-chlorophenyl)glycinate:<sup>12</sup> white solid, ethyl acetate/hexane = 1:10,  $R_f = 0.3$ .  $^1\text{H NMR}$  ( $\text{CDCl}_3$ , 300 MHz),  $\delta$  7.12 (d, 2H), 6.54 (d, 2H), 4.25 (q, 3H), 3.87 (d, 2H), 1.29 (q, 3H).

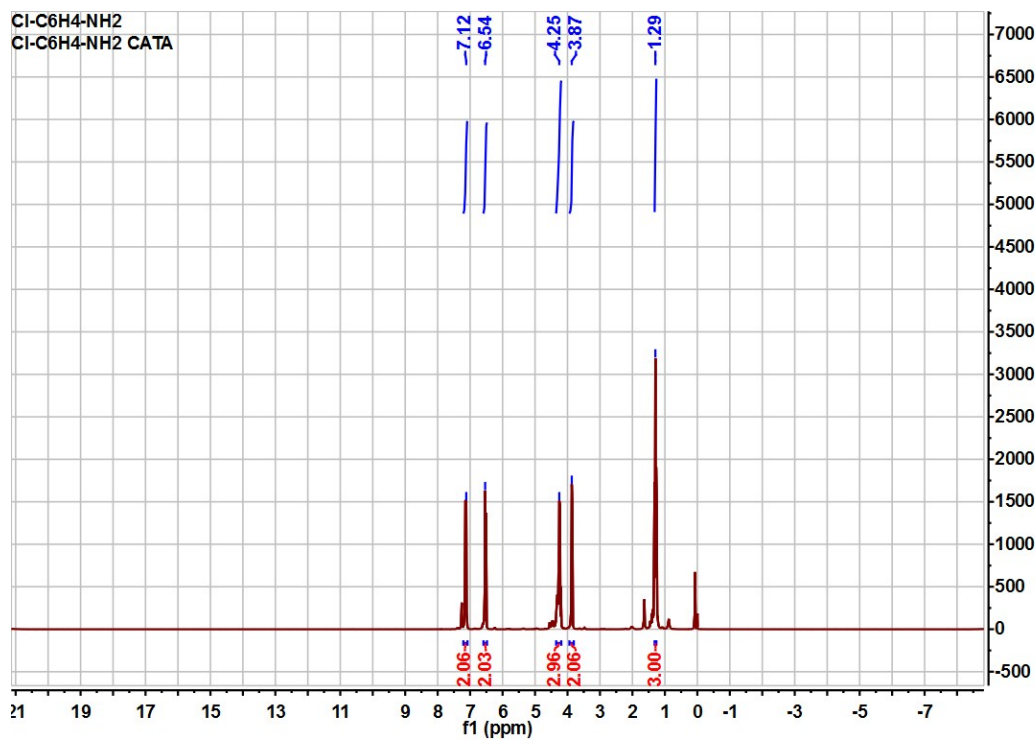

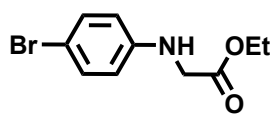

Ethyl (4-bromophenyl)glycinate:<sup>12</sup> white solid, ethyl acetate/hexane = 1:10,  $R_f = 0.4$ .  $^1\text{H NMR}$  ( $\text{CDCl}_3$ , 300 MHz),  $\delta$  7.27 (d, 2H), 6.51 (d, 2H), 4.28 (q, 3H), 3.88 (d, 2H), 1.32 (q, 3H).

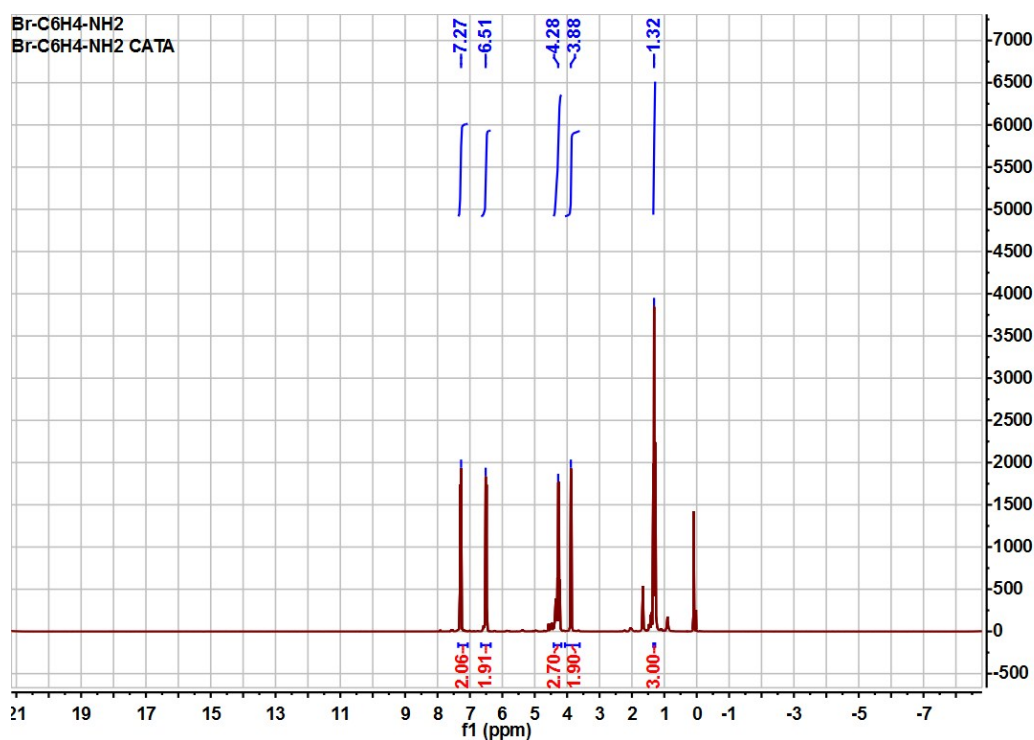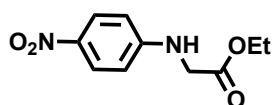

Ethyl (4-nitrophenyl)glycinate:<sup>13</sup> yellow solid, ethyl acetate/hexane = 2:5,  $R_f = 0.4$ .  $^1\text{H NMR}$  ( $\text{CDCl}_3$ , 300 MHz),  $\delta$  8.08 (d, 2H), 6.53 (d, 2H), 5.13 (s, 1H), 4.27 (q, 3H), 3.98 (d, 2H), 1.31 (q, 3H).

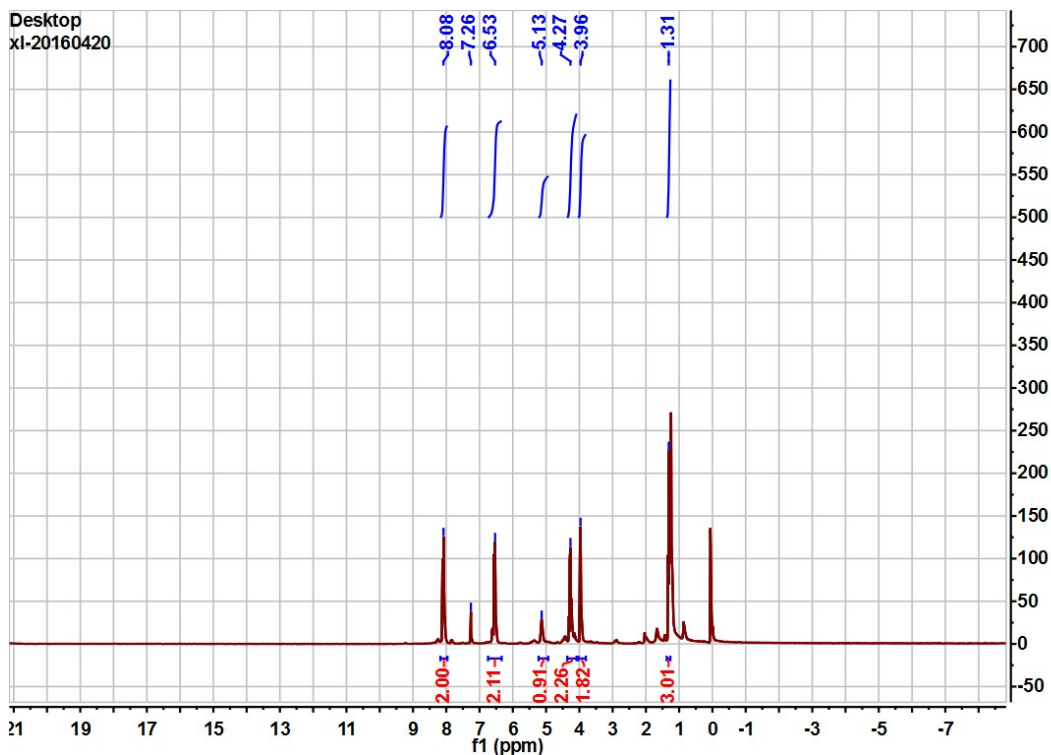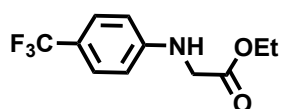

Ethyl (4-(trifluoromethyl)phenyl)glycinate:<sup>12</sup> white solid, ethyl

acetate/hexane = 1:10,  $R_f = 0.3$ .  $^1\text{H NMR}$  ( $\text{CDCl}_3$ , 300 MHz),  $\delta$  7.41 (d, 2H), 6.62 (d, 2H), 4.66 (s, 1H), 4.27 (q, 2H), 3.92 (s, 2H), 1.31 (q, 3H).

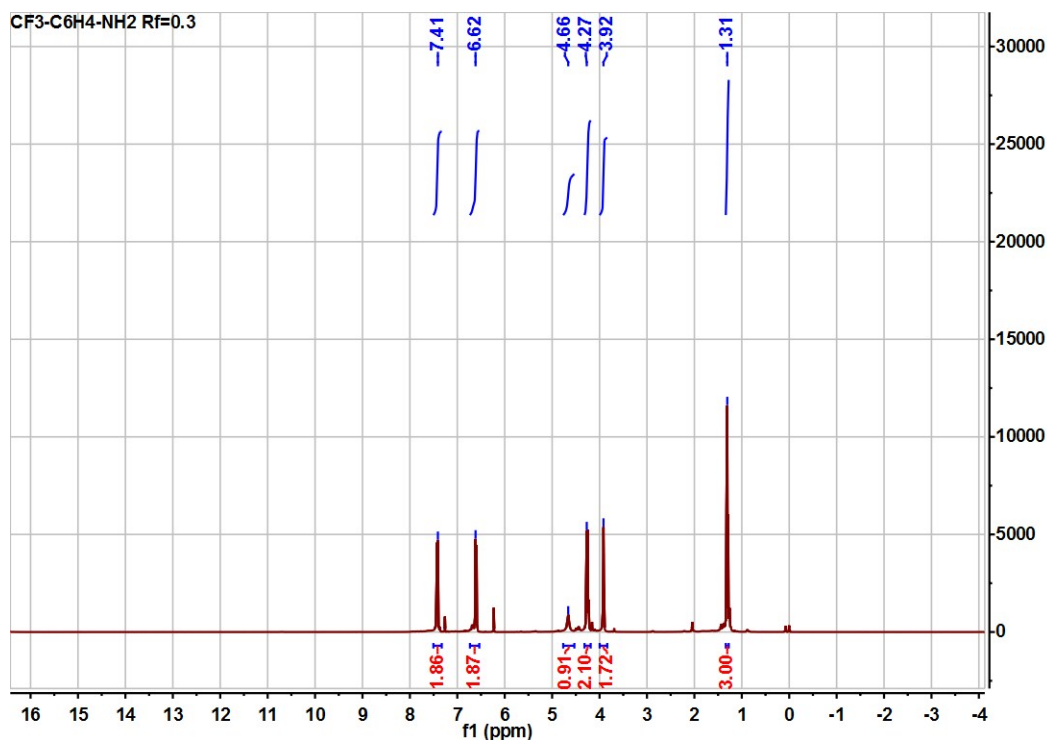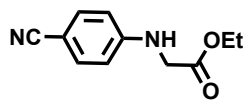

Ethyl (4-cyanophenyl)glycinate:<sup>12</sup> yellow solid, ethyl acetate/hexane = 2:5,  $R_f = 0.5$ .  $^1\text{H NMR}$  ( $\text{CDCl}_3$ , 300 MHz),  $\delta$  7.46 (d, 2H), 6.58 (d, 2H), 4.87 (s, 1H), 4.28 (q, 2H), 3.94 (s, 2H), 1.33 (q, 3H).

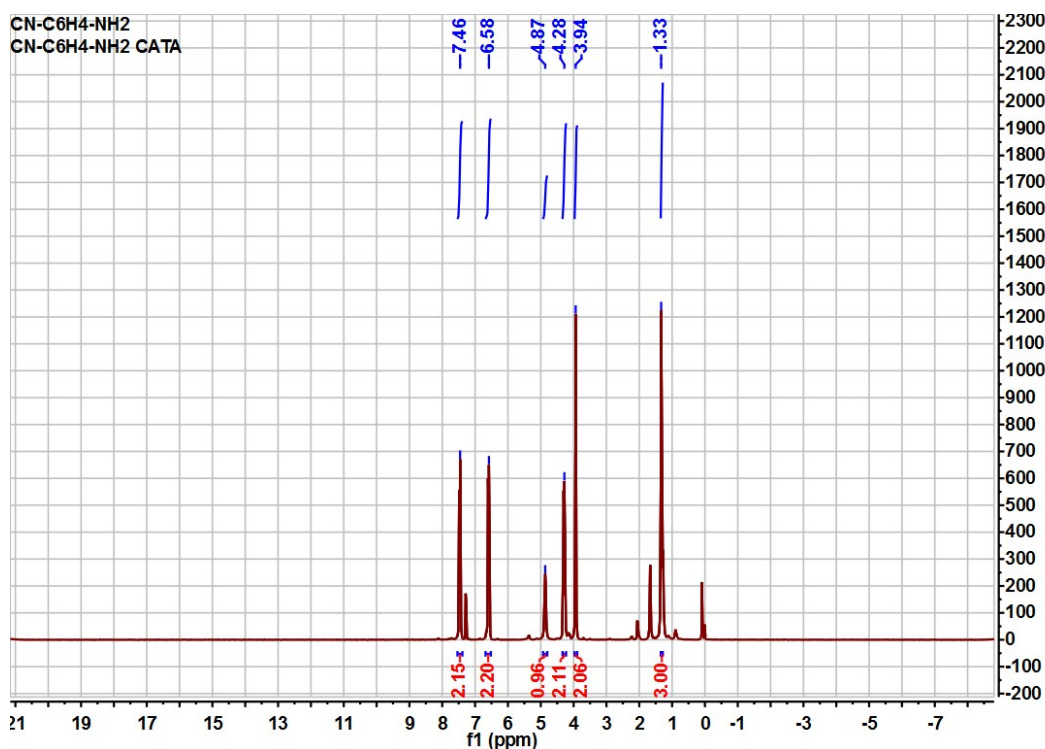

### S15. GC-MS profiles of the reaction of aniline in 10 mmol scale

RT: 0.00 - 18.09

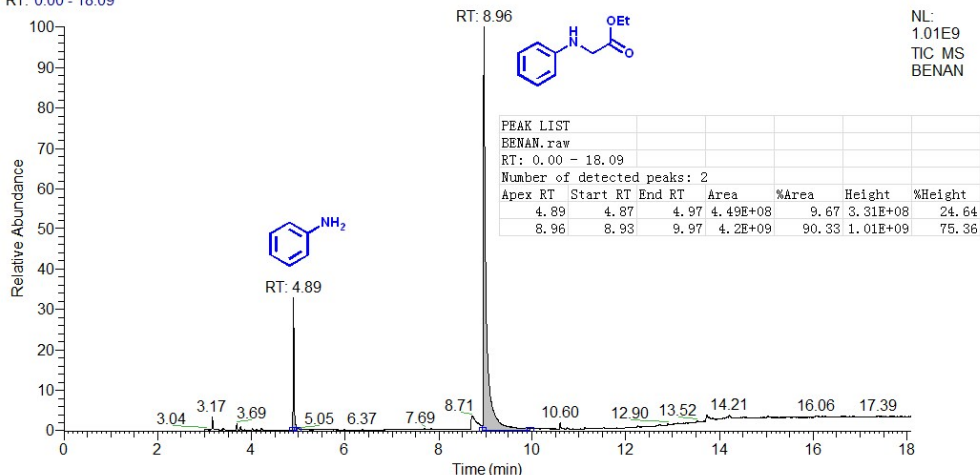

NL:  
1.01E9  
TIC MS  
BENAN

D:\RE-MPF\CATA\10 mmol scale\BENAN

2016/4/12 9:58:12

BENAN #536-576 RT: 4.82-4.96 AV: 41 NL: 2.27E7

T: + e EI Full ms [50.00-650.00]

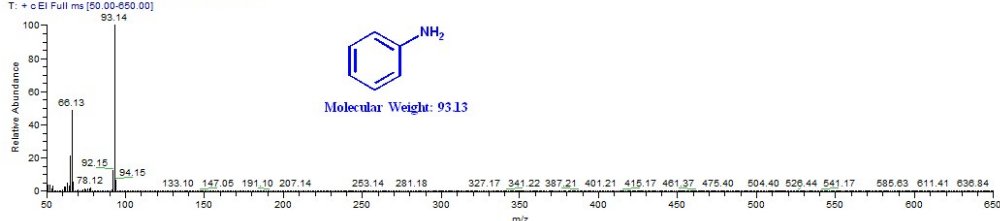

BENAN #1738-1772 RT: 8.91-9.02 AV: 35 NL: 2.05E8

T: + e EI Full ms [50.00-650.00]

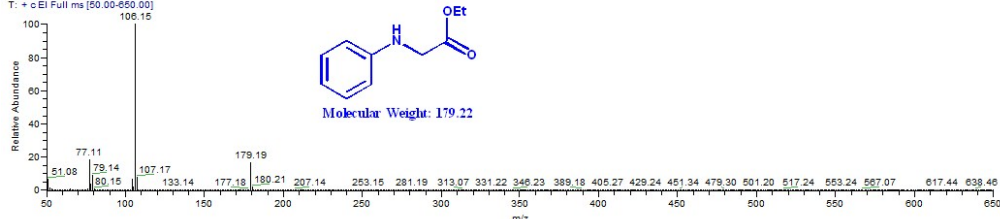

## S16. Crystal data for NUPF-2M.

| Compound             | NUPF-2Y                                                                         | NUPF-2Yb                                                                         | NUPF-2Dy                                                                         |
|----------------------|---------------------------------------------------------------------------------|----------------------------------------------------------------------------------|----------------------------------------------------------------------------------|
| CCDC number          | 1490360                                                                         | 1490362                                                                          | 1490366                                                                          |
| Empirical formula    | C <sub>144</sub> H <sub>97</sub> N <sub>12</sub> O <sub>41</sub> Y <sub>9</sub> | C <sub>144</sub> H <sub>97</sub> N <sub>12</sub> O <sub>41</sub> Yb <sub>9</sub> | C <sub>144</sub> H <sub>97</sub> N <sub>12</sub> O <sub>41</sub> Dy <sub>9</sub> |
| Formula weight       | 3451.53                                                                         | 4208.70                                                                          | 4113.84                                                                          |
| Temperature          | 123 K                                                                           | 123 K                                                                            | 123 K                                                                            |
| Wavelength           | 0.71073 Å                                                                       | 0.71073 Å                                                                        | 0.71073 Å                                                                        |
| Crystal system       | Hexagonal                                                                       | Hexagonal                                                                        | Hexagonal                                                                        |
| space group          | P6/mmm                                                                          | P6/mmm                                                                           | P6/mmm                                                                           |
| Unit cell dimensions | a=22.6495(13)Å α = 90°                                                          | a=22.7374(5)Å α = 90°                                                            | a=22.7374(5)Å α = 90°                                                            |
|                      | b=22.6495(13)Å β = 90°                                                          | b=22.7374(5) Å β = 90°                                                           | b=22.7374(5) Å β = 90°                                                           |
|                      | c=17.9177(12) Å γ = 120°                                                        | c=17.8238(8)Å γ = 120°                                                           | c=17.8238(8)Å γ = 120°                                                           |
| Volume               | 7960.3(8) Å <sup>3</sup>                                                        | 7980.2(4)Å <sup>3</sup>                                                          | 7980.2(4)Å <sup>3</sup>                                                          |

|                                   |                                             |                                             |                                             |
|-----------------------------------|---------------------------------------------|---------------------------------------------|---------------------------------------------|
| Z, Calculated density             | 1, 0.720 Mg/m <sup>3</sup>                  | 1, 0.876 Mg/m <sup>3</sup>                  | 1, 0.856 Mg/m <sup>3</sup>                  |
| Absorption coefficient            | 1.658 mm <sup>-1</sup>                      | 2.646 mm <sup>-1</sup>                      | 2.116 mm <sup>-1</sup>                      |
| F(000)                            | 1724                                        | 2003                                        | 1967                                        |
| Theta range for data collection   | 2.08 to 25.01°                              | 2.07 to 25.05°                              | 2.12 to 25.05°                              |
| Reflections collected / unique    | 57346 / 2749<br>[R(int) = 0.0547]           | 55858 / 2762<br>[R(int) = 0.0520]           | 55056 / 2737<br>[R(int) = 0.0510]           |
| Completeness to theta = 25.05     | 99.9 %                                      | 99.9 %                                      | 99.0 %                                      |
| Absorption correction             | Semi-empirical from equivalents             | Semi-empirical from equivalents             | Semi-empirical from equivalents             |
| Max. and min. transmission        | 0.6361 and 0.5945                           | 0.4028 and 0.3757                           | 0.5081 and 0.4848                           |
| Refinement method                 | Full-matrix least-squares on F <sup>2</sup> | Full-matrix least-squares on F <sup>2</sup> | Full-matrix least-squares on F <sup>2</sup> |
| Data / restraints / parameters    | 2749 / 0 / 142                              | 2762 / 0 / 141                              | 2737 / 0 / 141                              |
| Goodness-of-fit on F <sup>2</sup> | 1.897                                       | 1.108                                       | 2.176                                       |
| Final R indices [I>2sigma(I)]     | R1 = 0.1297,<br>wR2 = 0.3870                | R1 = 0.1247,<br>wR2 = 0.3376                | R1 = 0.1393,<br>wR2 = 0.4250                |
| R indices (all data)              | R1 = 0.1360,<br>wR2 = 0.3931                | R1 = 0.1296,<br>wR2 = 0.3418                | R1 = 0.1427,<br>wR2 = 0.4298                |
| Largest diff. peak and hole       | 2.221 and -2.992 e.A <sup>-3</sup>          | 3.076 and -7.814 e.A <sup>-3</sup>          | 2.752 and -6.878 e.A <sup>-3</sup>          |

|                        |                                                                                  |                                                                                  |                                                                                  |
|------------------------|----------------------------------------------------------------------------------|----------------------------------------------------------------------------------|----------------------------------------------------------------------------------|
| Compound               | NUPF-2Er                                                                         | NUPF-2Gd                                                                         | NUPF-2Tb                                                                         |
| CCDC number            | 1490367                                                                          | 1490368                                                                          | 1490369                                                                          |
| Empirical formula      | C <sub>144</sub> H <sub>97</sub> N <sub>12</sub> O <sub>41</sub> Er <sub>9</sub> | C <sub>144</sub> H <sub>97</sub> N <sub>12</sub> O <sub>41</sub> Gd <sub>9</sub> | C <sub>144</sub> H <sub>97</sub> N <sub>12</sub> O <sub>41</sub> Tb <sub>9</sub> |
| Formula weight         | 4156.68                                                                          | 4066.59                                                                          | 4081.62                                                                          |
| Temperature            | 123 K                                                                            | 123 K                                                                            | 123 K                                                                            |
| Wavelength             | 0.71073 Å                                                                        | 0.71073 Å                                                                        | 0.71073 Å                                                                        |
| Crystal system         | Hexagonal                                                                        | Hexagonal                                                                        | Hexagonal                                                                        |
| space group            | P6/mmm                                                                           | P6/mmm                                                                           | P6/mmm                                                                           |
| Unit cell dimensions   | a=22.7374(5)Å α = 90°                                                            | a=22.7374(5)Å α = 90°                                                            | a=22.7374(5)Å α = 90°                                                            |
|                        | b=22.7374(5) Å β= 90 °                                                           | b=22.7374(5) Å β= 90 °                                                           | b=22.7374(5) Å β= 90 °                                                           |
|                        | c=17.8238(8)Å γ= 120 °                                                           | c=17.8238(8)Å γ= 120 °                                                           | c=17.8238(8)Å γ= 120 °                                                           |
| Volume                 | 7980.2(4)Å <sup>3</sup>                                                          | 7980.2(4)Å <sup>3</sup>                                                          | 7980.2(4)Å <sup>3</sup>                                                          |
| Z, Calculated density  | 1, 0.865 Mg/m <sup>3</sup>                                                       | 1, 0.846 Mg/m <sup>3</sup>                                                       | 1, 0.849Mg/m <sup>3</sup>                                                        |
| Absorption coefficient | 2.376 mm <sup>-1</sup>                                                           | 1.879 mm <sup>-1</sup>                                                           | 2.004 mm <sup>-1</sup>                                                           |

| F(000)                            | 1985                                        | 1949                                        | 1958                                        |
|-----------------------------------|---------------------------------------------|---------------------------------------------|---------------------------------------------|
| Theta range for data collection   | 2.12 to 25.05°                              | 2.36 to 25.05°                              | 2.07 to 25.05°                              |
| Reflections collected / unique    | 56263 / 2761<br>[R(int) = 0.0471]           | 57012 / 2730<br>[R(int) = 0.0571]           | 51916 / 2738<br>[R(int) = 0.0631]           |
| Completeness to theta = 25.05     | 99.8 %                                      | 98.7 %                                      | 99.0 %                                      |
| Absorption correction             | Semi-empirical from equivalents             | Semi-empirical from equivalents             | Semi-empirical from equivalents             |
| Max. and min. transmission        | 0.4500 and 0.4282                           | 0.5592 and 0.5353                           | 0.5848 and 0.5577                           |
| Refinement method                 | Full-matrix least-squares on F <sup>2</sup> | Full-matrix least-squares on F <sup>2</sup> | Full-matrix least-squares on F <sup>2</sup> |
| Data / restraints / parameters    | 2761 / 0 / 141                              | 2730 / 0 / 141                              | 2738 / 0 / 141                              |
| Goodness-of-fit on F <sup>2</sup> | 1.039                                       | 2.413                                       | 2.360                                       |
| Final R indices [I>2sigma(I)]     | R1 = 0.1274,<br>wR2 = 0.3201                | R1 = 0.1573,<br>wR2 = 0.4669                | R1 = 0.1765,<br>wR2 = 0.4736                |
| R indices (all data)              | R1 = 0.1313,<br>wR2 = 0.3229                | R1 = 0.1604,<br>wR2 = 0.4711                | R1 = 0.1836,<br>wR2 = 0.4808                |
| Largest diff. peak and hole       | 2.011 and -6.095 e.A <sup>-3</sup>          | 2.773 and -7.346e.A <sup>-3</sup>           | 3.127 and -6.832e.A <sup>-3</sup>           |

## S17. References

1. D. Feng, Z.-Y. Gu, J.-R. Li, H.-L. Jiang, Z. Wei and H.-C. Zhou, *Angew. Chem. Int. Ed.*, 2012, **51**, 10307-10310; L. Maqueira, A. Iribarren, A. C. Valdés, C. P. de Meloc and C. G. dos Santos, *J. Porphyrins and Phthalocyanines*, 2012, **16**, 267-272.
2. Z. Sun, Y. She and R. Zhong, *Front. Chem. Eng. China*, 2009, **3**, 457-461.
3. C. H. Gorbitz, *Acta Crystallog. B*, 1999, **55**, 1090-1098.
4. G. M. Sheldrick, *Acta Crystallog. A*, 2008, **64**, 112-122.
5. A. Spek, *J. Appl. Crystallog.*, 2003, **36**, 7-13.
6. X.-S. Wang, M. Chrzanowski, W.-Y. Gao, L. Wojtas, Y.-S. Chen, M. J. Zaworotko and S. Ma, *Chem. Sci.*, 2012, **3**, 2823-2827; L. Meng, Q. Cheng, C. Kim, W.-Y. Gao, L. Wojtas, Y.-S. Chen, M. J. Zaworotko, X. P. Zhang and S. Ma, *Angew. Chem. Int. Ed.*, 2012, **51**, 10082-10085.
7. D. Feng, Z.-Y. Gu, Y.-P. Chen, J. Park, Z. Wei, Y. Sun, M. Bosch, S. Yuan and H.-C. Zhou, *J. Am. Chem. Soc.*, 2014, **136**, 17714-17717.
8. X. Lu, Z. Geng, Y. Wang, B. Lv and J. Kang, *Synth. React. Inorg. Met-Org. Chem.*, 2002, **32**, 843-851; D. W. Thomas and A. E. Martell, *J. Am. Chem. Soc.*, 1959, **81**, 5111-5119.
9. R. J. P. Williams, *Chem. Rev.*, 1956, **56**, 299-328; M. Jahan, Q. Bao and K. P. Loh, *J. Am. Chem. Soc.*, 2012, **134**, 6707-6713.
10. S. A. Moore and D. E. G. Shuker, *J. Labelled. Comp. Radiopharm.*, 2011, **54**, 855-858.
11. I. Aviv and Z. Gross, *Chem. Eur. J.*, 2008, **14**, 3995-4005.
12. R. Rohlmann, T. Stopka, H. Richter and O. García Mancheño, *J. Org. Chem.*, 2013, **78**, 6050-6064.
13. G. Sreenilayam and R. Fasan, *Chem. Commun.*, 2015, **51**, 1532-1534.
